# Supplementary material for: Greenland and Canadian Arctic ice temperature profiles database
Source: Copernicus journal article supplement (doi:10.5194/tc-17-3829-2023), 2023-09-08
Supplement: Supplementary file 1 [file tc-17-3829-2023-supplement.zip]

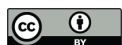

## *Supplement of*

# **Greenland and Canadian Arctic ice temperature profiles database**

**Anja Løkkegaard et al.**

*Correspondence to:* Anja Løkkegaard (aloe@geus.dk)

- tc-17-3829-2023-supplement-title-page.pdf
- revised\_supplementary
  - Borehole\_Categories.csv

The copyright of individual parts of the supplement might differ from the article licence.
